# Supplementary material for: Endocrine-responsive lobular carcinoma of the breast: features associated with risk of late distant recurrence
Source: Springer Nature journal article supplement (doi:10.1186/s13058-019-1234-9), 2019-12-01
Supplement: MOESM1 [file 17642226]

**Table S1.** Type and distribution of events over time.

|                                       | <b>N</b>      |
|---------------------------------------|---------------|
| <b>All FUP years</b>                  |               |
| No event                              | 1352          |
| Loco-regional events                  | 160           |
| Distant metastases                    | 205           |
| Other                                 | 155           |
| -----                                 |               |
| Alive                                 | 1689          |
| Dead                                  | 183           |
| <b>First five years from surgery</b>  |               |
| DFS events                            | 279           |
| Yearly rate, × 100 PY (95% CI)        | 3.4 (3.0-3.8) |
| DM events                             | 116           |
| Yearly rate, × 100 PY (95% CI)        | 1.4 (1.2-1.7) |
| <b>Beyond five year after surgery</b> |               |
| DFS events                            | 241           |
| Yearly rate, × 100 PY (95% CI)        | 4.3 (3.8-4.9) |
| DM events                             | 89            |
| Yearly rate, × 100 PY (95% CI)        | 1.6 (1.3-1.9) |

**Table S2.** Prognostic factors of **early** ( $\leq 5$  years) and **late** ( $>5$  years) DFS events in ILCs, univariate and multivariate analysis.

|                          | $\leq 5$ years       |                      |      |           |                 | $>5$ years           |                      |      |           |                 |                                                      |           |                 | Heterogeneity<br><i>p</i> -value<br>(univariate<br>analyses) |
|--------------------------|----------------------|----------------------|------|-----------|-----------------|----------------------|----------------------|------|-----------|-----------------|------------------------------------------------------|-----------|-----------------|--------------------------------------------------------------|
|                          | Univariable analysis |                      |      |           |                 | Univariable analysis |                      |      |           |                 | Multivariable analysis<br>for late DFS ( $>5$ years) |           |                 |                                                              |
|                          | N                    | Distant<br>events/PY | HR   | 95% CI    | <i>P</i> -value | N                    | Distant<br>events/PY | HR   | 95% CI    | <i>P</i> -value | HR                                                   | 95% CI    | <i>P</i> -value |                                                              |
| <b>Ki-67 (%)</b>         |                      |                      |      |           |                 |                      |                      |      |           |                 |                                                      |           |                 |                                                              |
| <20%                     | 1375                 | 184/6110             | Ref. |           |                 | 1060                 | 149/4046             | Ref. |           |                 | Ref.                                                 |           |                 |                                                              |
| $\geq 20\%$              | 497                  | 95/2165              | 1.46 | 1.14-1.87 | 0.003           | 366                  | 92/1562              | 1.56 | 1.20-2.03 | <0.001          | 1.71                                                 | 1.26-2.32 | <0.001          | 0.73                                                         |
| <b>HER2<sup>a</sup></b>  |                      |                      |      |           |                 |                      |                      |      |           |                 |                                                      |           |                 |                                                              |
| Not expressed            | 1727                 | 247/7629             | Ref. |           |                 | 1318                 | 206/5009             | Ref. |           |                 | Ref.                                                 |           |                 |                                                              |
| Intense and complete     | 72                   | 23/300               | 2.40 | 1.56-3.67 | <0.001          | 45                   | 13/159               | 1.99 | 1.13-3.48 | 0.02            | 1.79                                                 | 0.99-3.19 | 0.05            | 0.67                                                         |
| <b>pN</b>                |                      |                      |      |           |                 |                      |                      |      |           |                 |                                                      |           |                 |                                                              |
| pN0                      | 1103                 | 99/5017              | Ref. |           |                 | 901                  | 126/3397             | Ref. |           |                 | Ref.                                                 |           |                 |                                                              |
| pN1/2/3                  | 769                  | 180/3259             | 2.83 | 2.21-3.62 | <0.001          | 525                  | 115/2212             | 1.38 | 1.07-1.77 | 0.01            | 1.20                                                 | 0.92-1.57 | 0.17            | <0.001                                                       |
| <b>Grade<sup>b</sup></b> |                      |                      |      |           |                 |                      |                      |      |           |                 |                                                      |           |                 |                                                              |
| G1/2                     | 1511                 | 186/6767             | Ref. |           |                 | 1190                 | 187/4649             | Ref. |           |                 | Ref.                                                 |           |                 |                                                              |
| G3                       | 209                  | 55/871               | 2.32 | 1.72-3.14 | <0.001          | 135                  | 31/568               | 1.33 | 0.91-1.94 | 0.15            | 0.93                                                 | 0.61-1.42 | 0.74            | 0.04                                                         |
| <b>pT</b>                |                      |                      |      |           |                 |                      |                      |      |           |                 |                                                      |           |                 |                                                              |
| pT1/2                    | 1672                 | 224/7447             | Ref. |           |                 | 1298                 | 206/5140             | Ref. |           |                 | Ref.                                                 |           |                 |                                                              |
| pT3/4                    | 200                  | 55/828               | 2.24 | 1.67-3.00 | <0.001          | 128                  | 35/468               | 1.90 | 1.32-2.71 | <0.001          | 1.75                                                 | 1.19-2.57 | 0.004           | 0.49                                                         |
| <b>PgR</b>               |                      |                      |      |           |                 |                      |                      |      |           |                 |                                                      |           |                 |                                                              |
| <20%                     | 555                  | 105/2392             | Ref. |           |                 | 402                  | 83/1727              | Ref. |           |                 | Ref.                                                 |           |                 |                                                              |
| $\geq 20\%$              | 1317                 | 174/5883             | 0.67 | 0.53-0.85 | 0.001           | 1024                 | 158/3881             | 0.86 | 0.66-1.13 | 0.28            | 0.85                                                 | 0.64-1.11 | 0.23            | 0.16                                                         |

<sup>a</sup> For patients with HER2 unknown 9 events occurred within the first 5 years of FUP and 22 beyond 5 years.

<sup>b</sup> For patients with grade unknown 38 events occurred within the first 5 years of FUP and 23 beyond 5 years.

**Table S3.** Prognostic factors of late (>5 years) DFS in ILCs by lymph-node status.

|                          | pN0 (N=901)            |           |      |           |                | pN1/2/3 (N=525)        |           |      |           |                | <i>P-value for interaction with pN</i> |
|--------------------------|------------------------|-----------|------|-----------|----------------|------------------------|-----------|------|-----------|----------------|----------------------------------------|
|                          | Multivariable analysis |           |      |           |                | Multivariable analysis |           |      |           |                |                                        |
|                          | N                      | Events/PY | HR   | 95% CI    | <i>P-value</i> | N                      | Events/PY | HR   | 95% CI    | <i>P-value</i> |                                        |
| <b>Ki-67 (%)</b>         |                        |           |      |           |                |                        |           |      |           |                |                                        |
| <20%                     | 701                    | 82/2584   | Ref. |           |                | 359                    | 67/1462   | Ref. |           |                |                                        |
| ≥20%                     | 200                    | 44/812    | 1.61 | 1.04-2.50 | 0.03           | 166                    | 48/750    | 1.84 | 1.20-2.82 | 0.005          | 0.61                                   |
| <b>HER2<sup>a</sup></b>  |                        |           |      |           |                |                        |           |      |           |                |                                        |
| Not expressed            | 846                    | 107/3116  | Ref. |           |                | 472                    | 99/1893   | Ref. |           |                |                                        |
| Intense and complete     | 26                     | 7/85      | 2.29 | 1.05-4.98 | 0.04           | 19                     | 6/74      | 1.49 | 0.63-3.53 | 0.37           | 0.12                                   |
| <b>Grade<sup>b</sup></b> |                        |           |      |           |                |                        |           |      |           |                |                                        |
| G1/2                     | 791                    | 102/2993  | Ref. |           |                | 399                    | 85/1657   | Ref. |           |                |                                        |
| G3                       | 72                     | 16/279    | 1.13 | 0.63-2.06 | 0.68           | 63                     | 15/289    | 0.77 | 0.43-1.39 | 0.38           | 0.17                                   |
| <b>pT</b>                |                        |           |      |           |                |                        |           |      |           |                |                                        |
| pT1/2                    | 864                    | 118/3272  | Ref. |           |                | 434                    | 88/1868   | Ref. |           |                |                                        |
| pT3/4                    | 37                     | 8/125     | 1.61 | 0.77-3.37 | 0.21           | 91                     | 27/344    | 1.81 | 1.15-2.84 | 0.01           | 0.88                                   |
| <b>PgR</b>               |                        |           |      |           |                |                        |           |      |           |                |                                        |
| <20%                     | 245                    | 43/1005   | Ref. |           |                | 157                    | 40/722    | Ref. |           |                |                                        |
| ≥20%                     | 656                    | 83/2391   | 0.79 | 0.54-1.15 | 0.21           | 368                    | 75/1490   | 0.83 | 0.55-1.25 | 0.37           | 0.50                                   |

<sup>a</sup> 29 patients pN0 with missing information (12 events/195 PY), 34 patients pN1/2/3 with missing information (10 events/244 PY).

<sup>b</sup> 38 patients pN0 with missing information (8 events/124 PY), 63 patients pN1/2/3 with missing information (15 events/266 PY).

**Figure S1.** Flowchart for patient's selection and matching.

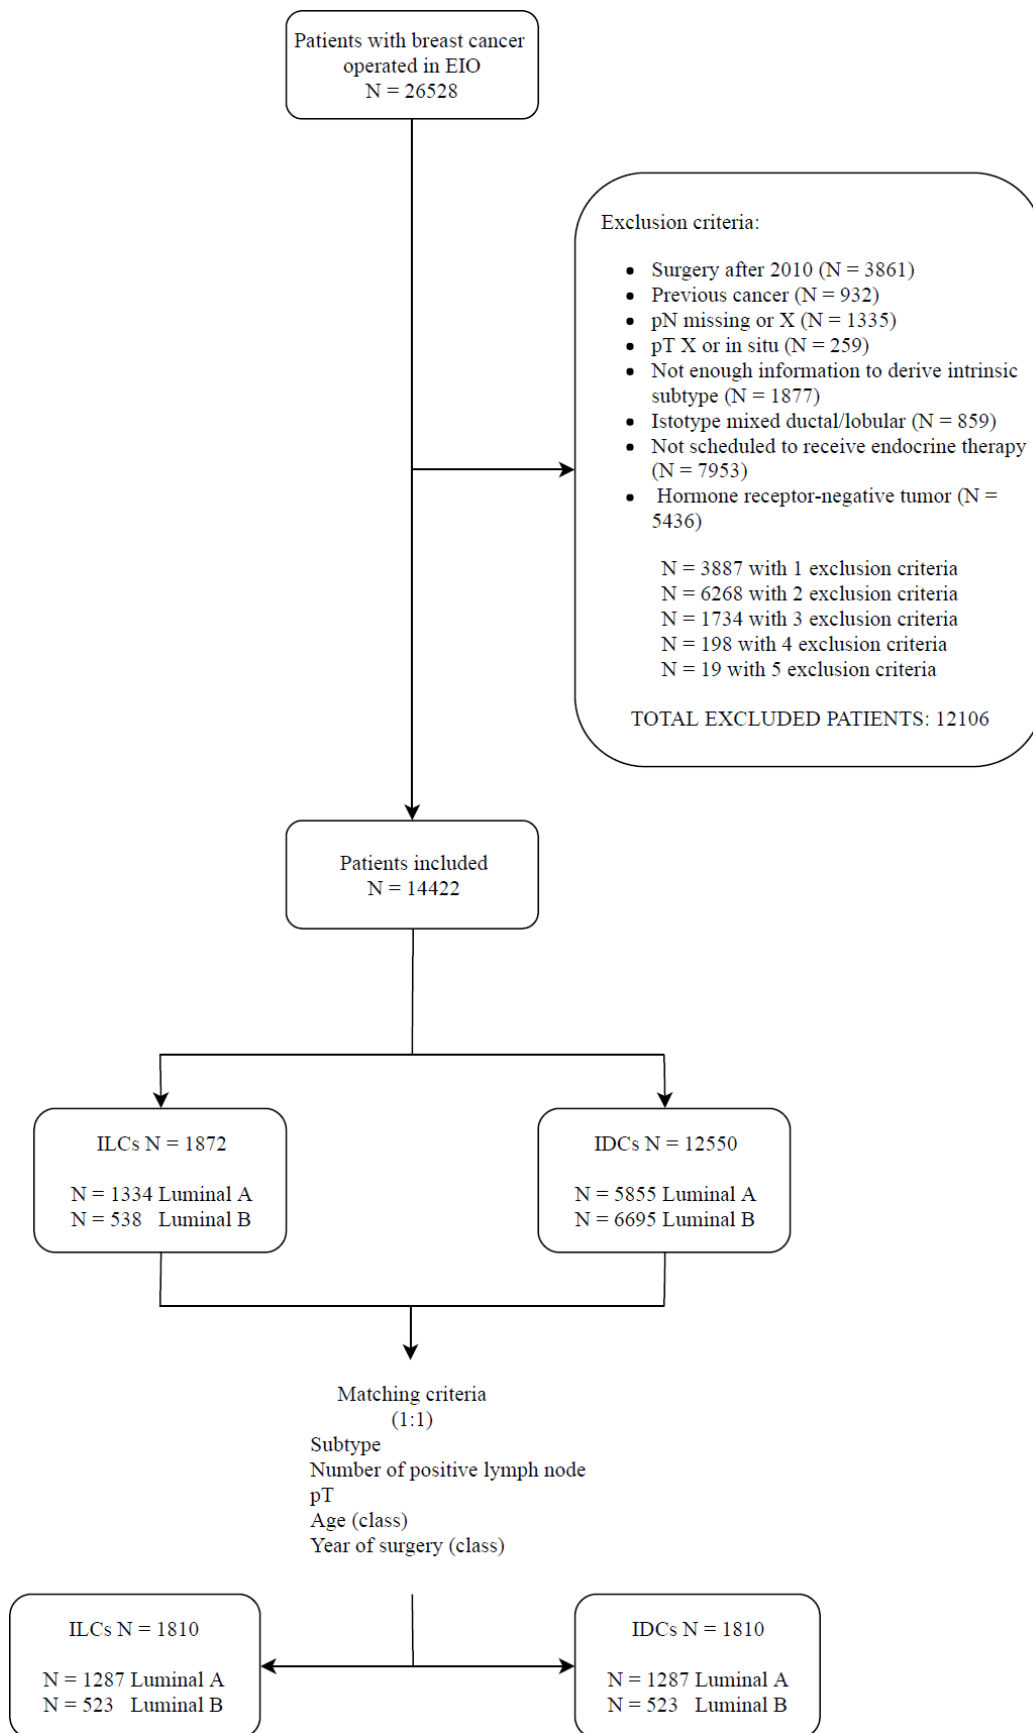

**Table S4.** Distribution of patient baseline characteristics according to intrinsic and histological subtype – matched groups

|                                              | Lobular<br>(N=1810) |    | Ductal<br>(N=1810) |    | P-value |
|----------------------------------------------|---------------------|----|--------------------|----|---------|
|                                              | N                   | %  | N                  | %  |         |
| <b>Matching variables</b>                    |                     |    |                    |    |         |
| <b>Subtype</b>                               |                     |    |                    |    |         |
| Luminal A                                    | 1287                | 71 | 1287               | 71 |         |
| Luminal B                                    | 523                 | 29 | 523                | 29 |         |
| <b>pN</b>                                    |                     |    |                    |    |         |
| pN0                                          | 1076                | 60 | 1076               | 60 |         |
| pN1                                          | 439                 | 24 | 439                | 24 |         |
| pN2                                          | 129                 | 7  | 129                | 7  |         |
| pN3                                          | 166                 | 9  | 166                | 9  |         |
| <b>pT</b>                                    |                     |    |                    |    |         |
| pT1                                          | 1055                | 58 | 1055               | 58 |         |
| pT2                                          | 608                 | 34 | 608                | 34 |         |
| pT3/4                                        | 147                 | 8  | 147                | 8  |         |
| <b>Age group</b>                             |                     |    |                    |    |         |
| <50                                          | 638                 | 35 | 638                | 35 |         |
| 50-59                                        | 519                 | 29 | 519                | 29 |         |
| 60+                                          | 653                 | 36 | 653                | 36 |         |
| <b>Year of surgery</b>                       |                     |    |                    |    |         |
| Before 2003                                  | 520                 | 29 | 520                | 29 |         |
| 2003-2006                                    | 641                 | 35 | 641                | 35 |         |
| 2007-2010                                    | 649                 | 36 | 649                | 36 |         |
| <b>Other variables</b>                       |                     |    |                    |    |         |
| <b>Menopausal status</b>                     |                     |    |                    |    | 0.31    |
| Premenopausal                                | 777                 | 43 | 747                | 41 |         |
| Postmenopausal                               | 1033                | 57 | 1063               | 59 |         |
| <b>Tumor grade<sup>a</sup></b>               |                     |    |                    |    | <0.001  |
| G1                                           | 276                 | 15 | 423                | 23 |         |
| G2                                           | 1201                | 66 | 923                | 51 |         |
| G3                                           | 196                 | 11 | 275                | 15 |         |
| Unknown                                      | 137                 | 8  | 189                | 11 |         |
| <b>Vessel invasion</b>                       |                     |    |                    |    | <0.001  |
| No                                           | 1739                | 96 | 1281               | 71 |         |
| Yes                                          | 71                  | 4  | 529                | 29 |         |
| <b>Local treatment</b>                       |                     |    |                    |    | <0.001  |
| Mastectomy w/o RT                            | 322                 | 18 | 242                | 14 |         |
| Mastectomy w RT                              | 230                 | 13 | 217                | 12 |         |
| Quadrantectomy w/o RT                        | 35                  | 2  | 25                 | 1  |         |
| Quadrantectomy w RT                          | 1223                | 67 | 1326               | 73 |         |
| <b>Adjuvant treatment</b>                    |                     |    |                    |    | 0.01    |
| ET                                           | 1440                | 80 | 1379               | 76 |         |
| CT+ET                                        | 370                 | 20 | 431                | 24 |         |
| <b>Receptor status</b>                       |                     |    |                    |    | 0.33    |
| Incompletely expressed<br>(ER<50 or PgR<50)  | 807                 | 45 | 778                | 43 |         |
| Highly expressed<br>(ER≥50 and PgR≥50)       | 1003                | 55 | 1032               | 57 |         |
| <b>Ki-67</b>                                 |                     |    |                    |    | 0.35    |
| <20%                                         | 1327                | 73 | 1302               | 72 |         |
| ≥20%                                         | 483                 | 27 | 508                | 28 |         |
| <b>ER Mean (SD) / Median (IQR)</b>           |                     |    |                    |    | <0.001  |
| 83 (17) / 90 (80-95)    86 (15) / 90 (85-95) |                     |    |                    |    |         |
| <b>PgR Mean (SD) / Median (IQR)</b>          |                     |    |                    |    | 0.01    |
| 51 (37) / 60 (10-90)    53 (37) / 60 (10-90) |                     |    |                    |    |         |
| <b>Ki67 Mean (SD) / Median (IQR)</b>         |                     |    |                    |    | <0.001  |
| 15 (9) / 14 (9-20)    17 (11) / 15 (10-21)   |                     |    |                    |    |         |

<sup>a</sup>Missing values are not considered in the p-value calculation

**Table S5.** Prognostic factors of **early** ( $\leq 5$  years) and **late** ( $> 5$  years) **distant recurrences** in **IDCs** and **ILCs**, univariable analysis.

| Histological subtype    |         | $\leq 5$ years |                   |      |           |          | $> 5$ years |                   |      |           |          | Heterogeneity p-value |
|-------------------------|---------|----------------|-------------------|------|-----------|----------|-------------|-------------------|------|-----------|----------|-----------------------|
|                         |         | N              | Distant events/PY | HR   | 95% CI    | P-value  | N           | Distant events/PY | HR   | 95% CI    | P-value  |                       |
| <b>ER<sup>+</sup></b>   |         |                |                   |      |           |          |             |                   |      |           |          |                       |
| $< 20\%$                | Lobular | 1327           | 61/5913           | Ref. |           |          | 1035        | 50/3958           | Ref. |           |          |                       |
| $\geq 20\%$             | Lobular | 483            | 43/2111           | 1.96 | 1.33-2.90 | $<0.001$ | 358         | 35/1535           | 1.79 | 1.17-2.75 | 0.008    | 0.73                  |
| $< 20\%$                | Ductal  | 1302           | 56/5700           | Ref. |           |          | 921         | 35/3228           | Ref. |           |          |                       |
| $\geq 20\%$             | Ductal  | 508            | 58/2098           | 2.73 | 1.89-3.94 | $<0.001$ | 314         | 21/1249           | 1.57 | 0.91-2.70 | 0.11     | 0.10                  |
| Heterogeneity p-value   |         |                |                   |      |           | 0.23     |             |                   |      |           | 0.70     |                       |
| <b>ER<sup>-</sup></b>   |         |                |                   |      |           |          |             |                   |      |           |          |                       |
| <b>HER2<sup>+</sup></b> |         |                |                   |      |           |          |             |                   |      |           |          |                       |
| Not expressed           | Lobular | 1671           | 91/7399           | Ref. |           |          | 1288        | 75/4908           | Ref. |           |          |                       |
| Incomplete              | Lobular | 69             | 10/291            | 2.68 | 1.40-5.09 | 0.003    | 44          | 3/155             | 1.19 | 0.37-3.80 | 0.77     | 0.23                  |
| Not expressed           | Ductal  | 1691           | 99/7322           | Ref. |           |          | 1164        | 45/4120           | Ref. |           |          |                       |
| Incomplete              | Ductal  | 69             | 7/275             | 1.88 | 0.87-4.04 | 0.11     | 39          | 5/149             | 3.18 | 1.27-7.99 | 0.01     | 0.42                  |
| Heterogeneity p-value   |         |                |                   |      |           | 0.49     |             |                   |      |           | 0.19     |                       |
| <b>HER2<sup>-</sup></b> |         |                |                   |      |           |          |             |                   |      |           |          |                       |
| $\leq N0$               | Lobular | 1076           | 14/4900           | Ref. |           |          | 883         | 26/3336           | Ref. |           |          |                       |
| $> N1/2/3$              | Lobular | 734            | 90/3123           | 10.0 | 5.70-17.6 | $<0.001$ | 510         | 59/2157           | 3.58 | 2.26-5.67 | $<0.001$ | 0.005                 |
| $\leq N0$               | Ductal  | 1076           | 24/4767           | Ref. |           |          | 778         | 11/2840           | Ref. |           |          |                       |
| $> N1/2/3$              | Ductal  | 734            | 90/3031           | 5.80 | 3.70-9.08 | $<0.001$ | 457         | 45/1637           | 7.13 | 3.69-13.8 | $<0.001$ | 0.61                  |
| Heterogeneity p-value   |         |                |                   |      |           | 0.14     |             |                   |      |           | 0.09     |                       |
| <b>Grade</b>            |         |                |                   |      |           |          |             |                   |      |           |          |                       |
| $\leq 1/2$              | Lobular | 1477           | 56/6629           | Ref. |           |          | 1173        | 68/4590           | Ref. |           |          |                       |
| $\geq 3$                | Lobular | 196            | 24/824            | 3.40 | 2.11-5.49 | $<0.001$ | 130         | 8/550             | 0.96 | 0.47-1.97 | 0.91     | 0.004                 |
| $\leq 1/2$              | Ductal  | 1346           | 37/5897           | Ref. |           |          | 959         | 28/3479           | Ref. |           |          |                       |
| $\geq 3$                | Ductal  | 275            | 42/1132           | 5.77 | 3.71-8.97 | $<0.001$ | 159         | 14/615            | 2.77 | 1.43-5.33 | 0.002    | 0.08                  |
| Heterogeneity p-value   |         |                |                   |      |           | 0.11     |             |                   |      |           | 0.03     |                       |
| <b>Stage</b>            |         |                |                   |      |           |          |             |                   |      |           |          |                       |
| $\leq T1/2$             | Lobular | 1663           | 82/7414           | Ref. |           |          | 1295        | 67/5131           | Ref. |           |          |                       |
| $> T3/4$                | Lobular | 147            | 22/609            | 3.21 | 1.99-5.17 | $<0.001$ | 98          | 18/363            | 3.77 | 2.28-6.26 | $<0.001$ | 0.62                  |
| $\leq T1/2$             | Ductal  | 1663           | 83/7213           | Ref. |           |          | 1157        | 45/4201           | Ref. |           |          |                       |
| $> T3/4$                | Ductal  | 147            | 31/584            | 4.61 | 3.05-6.98 | $<0.001$ | 78          | 11/276            | 3.65 | 1.89-7.03 | $<0.001$ | 0.52                  |
| Heterogeneity p-value   |         |                |                   |      |           | 0.26     |             |                   |      |           | 0.94     |                       |
| <b>Receptor</b>         |         |                |                   |      |           |          |             |                   |      |           |          |                       |
| $< 20\%$                | Lobular | 534            | 50/2324           | Ref. |           |          | 396         | 26/1703           | Ref. |           |          |                       |
| $\geq 20\%$             | Lobular | 1276           | 54/5700           | 0.44 | 0.30-0.65 | $<0.001$ | 997         | 59/3791           | 1.03 | 0.65-1.63 | 0.91     | 0.005                 |
| $< 20\%$                | Ductal  | 509            | 49/2187           | Ref. |           |          | 350         | 28/1322           | Ref. |           |          |                       |
| $\geq 20\%$             | Ductal  | 1301           | 65/5611           | 0.52 | 0.36-0.75 | $<0.001$ | 885         | 28/3155           | 0.41 | 0.24-0.69 | $<0.001$ | 0.45                  |
| Heterogeneity p-value   |         |                |                   |      |           | 0.54     |             |                   |      |           | 0.01     |                       |

<sup>‡</sup> For patients with HER2 unknown 11 events (3 ILCs, 8 IDCs) occurred within the first 5 years of FUP and 13 beyond 5 years (7 ILCs, 6 IDCs).

<sup>§</sup> For patients with grade unknown 59 events (24 ILCs, 35 IDCs) occurred within the first 5 years of FUP and 23 beyond 5 years (9 ILCs, 14 IDCs).

**Table S6.**

|                                     | <b>-2 log L</b> | <b>Likelihood-<br/>ratio test<br/>P-value</b> |
|-------------------------------------|-----------------|-----------------------------------------------|
| CTS5                                | 980.675         |                                               |
| CTS5 + HER2                         | 980.670         | 0.94                                          |
| CTS5 + ER                           | 980.541         | 0.71                                          |
| CTS5 + PgR                          | 980.611         | 0.80                                          |
| <b>CTS5 + ln(Ki-67)<sup>*</sup></b> | <b>976.784</b>  | <b>0.04</b>                                   |

<sup>\*</sup>ln: logarithmic transformation
